# Supplementary material
Source: publisher figshare collection journal article supplement (https://acs.figshare.com/ndownloader/files/4477276)
Supplement: Supplementary file 1 [file 4477276]

 
data_1 
 
_audit_creation_method            SHELXL-97 
_chemical_name_systematic 
; 
 ? 
; 
_chemical_name_common             ? 
_chemical_melting_point           ? 
_chemical_formula_moiety          ? 
_chemical_formula_sum 
 'C17 H16 Br Cl N2 Pt' 
_chemical_formula_weight          558.77 
 
loop_ 
 _atom_type_symbol 
 _atom_type_description 
 _atom_type_scat_dispersion_real 
 _atom_type_scat_dispersion_imag 
 _atom_type_scat_source 
 'C'  'C'   0.0033   0.0016 
 'International Tables Vol C Tables 4.2.6.8 and 6.1.1.4' 
 'H'  'H'   0.0000   0.0000 
 'International Tables Vol C Tables 4.2.6.8 and 6.1.1.4' 
 'N'  'N'   0.0061   0.0033 
 'International Tables Vol C Tables 4.2.6.8 and 6.1.1.4' 
 'Cl'  'Cl'   0.1484   0.1585 
 'International Tables Vol C Tables 4.2.6.8 and 6.1.1.4' 
 'Br'  'Br'  -0.2901   2.4595 
 'International Tables Vol C Tables 4.2.6.8 and 6.1.1.4' 
 'Pt'  'Pt'  -1.7033   8.3905 
 'International Tables Vol C Tables 4.2.6.8 and 6.1.1.4' 
 
_symmetry_cell_setting            triclinic 
_symmetry_space_group_name_H-M    P-1
 
loop_ 
 _symmetry_equiv_pos_as_xyz 
 'x, y, z' 
 '-x, -y, -z' 
 
_cell_length_a                    8.81750(10) 
_cell_length_b                    9.55110(10) 
_cell_length_c                    10.63720(10) 
_cell_angle_alpha                 87.2887(10) 
_cell_angle_beta                  73.8058(9) 
_cell_angle_gamma                 81.2471(9) 
_cell_volume                      850.256(15) 
_cell_formula_units_Z             2 
_cell_measurement_temperature     100(2) 
_cell_measurement_reflns_used   15367
_cell_measurement_theta_min     3.9564
_cell_measurement_theta_max     28.6809
 
_exptl_crystal_description        slab 
_exptl_crystal_colour             colourless
_exptl_crystal_size_max           0.38 
_exptl_crystal_size_mid           0.22 
_exptl_crystal_size_min           0.12 
_exptl_crystal_density_meas       ? 
_exptl_crystal_density_diffrn     2.183 
_exptl_crystal_density_method     'not measured' 
_exptl_crystal_F_000              524 
_exptl_absorpt_coefficient_mu     10.755 
_exptl_absorpt_correction_type    'multi-scan' 
_exptl_absorpt_correction_T_min   0.1055 
_exptl_absorpt_correction_T_max   0.3585 
_exptl_absorpt_process_details
;
CrysAlis RED, Oxford Diffraction Ltd.,
Version 1.171.32.24 (release 21-04-2008 CrysAlis171 .NET)
(compiled Apr 21 2008,18:23:10)
Empirical absorption correction using spherical harmonics,
 implemented in SCALE3 ABSPACK scaling algorithm.
;
 
_diffrn_ambient_temperature       100(2) 
_diffrn_radiation_wavelength      0.71073 
_diffrn_radiation_type            MoK\a 
_diffrn_radiation_source          'Enhance (Mo) X-ray Source' 
_diffrn_radiation_monochromator   graphite 
_diffrn_measurement_device_type   'Oxford Diffraction Xcalibur' 
_diffrn_measurement_method        omega 
_diffrn_detector_area_resol_mean  16.0655 
_diffrn_standards_number          ? 
_diffrn_standards_interval_count  ? 
_diffrn_standards_interval_time   ? 
_diffrn_standards_decay_%         ? 
_diffrn_reflns_number             17854 
_diffrn_reflns_av_R_equivalents   0.0244 
_diffrn_reflns_av_sigmaI/netI     0.0163 
_diffrn_reflns_limit_h_min        -11 
_diffrn_reflns_limit_h_max        11 
_diffrn_reflns_limit_k_min        -11 
_diffrn_reflns_limit_k_max        12 
_diffrn_reflns_limit_l_min        -13 
_diffrn_reflns_limit_l_max        13 
_diffrn_reflns_theta_min          3.97 
_diffrn_reflns_theta_max          27.50 
_diffrn_measurement_details
;
#__ type_ start__ end____ width___ exp.time_
  1 omega  -53.00   53.00   0.5000    8.0000
omega____ theta____ kappa____ phi______ omega'___ theta'___ frames
    -      -19.8053   77.0000  180.0000    0.0000    0.0000 212

#__ type_ start__ end____ width___ exp.time_
  2 omega  -53.00   53.00   0.5000    8.0000
omega____ theta____ kappa____ phi______ omega'___ theta'___ frames
    -      -19.8053   77.0000   60.0000    0.0000    0.0000 212

#__ type_ start__ end____ width___ exp.time_
  3 omega  -53.00   53.00   0.5000    8.0000
omega____ theta____ kappa____ phi______ omega'___ theta'___ frames
    -      -19.8053   77.0000  270.0000    0.0000    0.0000 212

#__ type_ start__ end____ width___ exp.time_
  4 omega  -53.00    2.00   0.5000    8.0000
omega____ theta____ kappa____ phi______ omega'___ theta'___ frames
    -      -19.8053   77.0000    0.0000    0.0000    0.0000 110

#__ type_ start__ end____ width___ exp.time_
  5 omega   -2.00   53.00   0.5000    8.0000
omega____ theta____ kappa____ phi______ omega'___ theta'___ frames
    -      -19.8053   77.0000  300.0000    0.0000    0.0000 110

#__ type_ start__ end____ width___ exp.time_
  6 omega  -11.00   44.00   0.5000    8.0000
omega____ theta____ kappa____ phi______ omega'___ theta'___ frames
    -       22.2271   77.0000  150.0000    0.0000    0.0000 110

#__ type_ start__ end____ width___ exp.time_
  7 omega  -95.00   55.00   0.5000    8.0000
omega____ theta____ kappa____ phi______ omega'___ theta'___ frames
    -      -19.8053    0.0000  240.0000    0.0000    0.0000 300

#__ type_ start__ end____ width___ exp.time_
  8 omega  -95.00   55.00   0.5000    8.0000
omega____ theta____ kappa____ phi______ omega'___ theta'___ frames
    -      -19.8053    0.0000   60.0000    0.0000    0.0000 300

#__ type_ start__ end____ width___ exp.time_
  9 omega  -95.00   55.00   0.5000    8.0000
omega____ theta____ kappa____ phi______ omega'___ theta'___ frames
    -      -19.8053    0.0000  330.0000    0.0000    0.0000 300

#__ type_ start__ end____ width___ exp.time_
 10 omega  -95.00   55.00   0.5000    8.0000
omega____ theta____ kappa____ phi______ omega'___ theta'___ frames
    -      -19.8053    0.0000    0.0000    0.0000    0.0000 300

#__ type_ start__ end____ width___ exp.time_
 11 omega  -95.00  -58.00   0.5000    8.0000
omega____ theta____ kappa____ phi______ omega'___ theta'___ frames
    -      -19.8053    0.0000  270.0000    0.0000    0.0000 74

;
_reflns_number_total              3777 
_reflns_number_gt                 3612 
_reflns_threshold_expression      >2sigma(I) 
 
_computing_data_collection
;
CrysAlis CCD, Oxford Diffraction Ltd.,
Version 1.171.32.24 (release 21-04-2008 CrysAlis171 .NET)
(compiled Apr 21 2008,18:23:10)
;
_computing_cell_refinement
;
CrysAlis RED, Oxford Diffraction Ltd.,
Version 1.171.32.24 (release 21-04-2008 CrysAlis171 .NET)
(compiled Apr 21 2008,18:23:10)
;
_computing_data_reduction
;
CrysAlis RED, Oxford Diffraction Ltd.,
Version 1.171.32.24 (release 21-04-2008 CrysAlis171 .NET)
(compiled Apr 21 2008,18:23:10)
;
_computing_structure_solution     'SHELXS-97 (Sheldrick, 1990)' 
_computing_structure_refinement   'SHELXL-97 (Sheldrick, 1997)' 
_computing_molecular_graphics     ? 
_computing_publication_material   ? 
 
_refine_special_details 
; 
 Refinement of F^2^ against ALL reflections.  The weighted R-factor wR and 
 goodness of fit S are based on F^2^, conventional R-factors R are based 
 on F, with F set to zero for negative F^2^. The threshold expression of 
 F^2^ > 2sigma(F^2^) is used only for calculating R-factors(gt) etc. and is 
 not relevant to the choice of reflections for refinement.  R-factors based 
 on F^2^ are statistically about twice as large as those based on F, and R- 
 factors based on ALL data will be even larger. 
; 
 
_refine_ls_structure_factor_coef  Fsqd  
_refine_ls_matrix_type            full 
_refine_ls_weighting_scheme       calc  
_refine_ls_weighting_details 
 'calc w=1/[\s^2^(Fo^2^)+(0.0305P)^2^+0.6139P] where P=(Fo^2^+2Fc^2^)/3' 
_atom_sites_solution_primary      direct 
_atom_sites_solution_secondary    difmap 
_atom_sites_solution_hydrogens    geom 
_refine_ls_hydrogen_treatment     mixed 
_refine_ls_extinction_method      none 
_refine_ls_extinction_coef        ? 
_refine_ls_number_reflns          3777 
_refine_ls_number_parameters      216 
_refine_ls_number_restraints      0 
_refine_ls_R_factor_all           0.0185 
_refine_ls_R_factor_gt            0.0173 
_refine_ls_wR_factor_ref          0.0445 
_refine_ls_wR_factor_gt           0.0441 
_refine_ls_goodness_of_fit_ref    1.033 
_refine_ls_restrained_S_all       1.033 
_refine_ls_shift/su_max           0.001 
_refine_ls_shift/su_mean          0.000 
 
loop_ 
 _atom_site_label 
 _atom_site_type_symbol 
 _atom_site_fract_x 
 _atom_site_fract_y 
 _atom_site_fract_z 
 _atom_site_U_iso_or_equiv 
 _atom_site_adp_type 
 _atom_site_occupancy 
 _atom_site_symmetry_multiplicity 
 _atom_site_calc_flag 
 _atom_site_refinement_flags 
 _atom_site_disorder_assembly 
 _atom_site_disorder_group 
Pt Pt -0.315447(11) 0.550616(10) -0.172661(9) 0.01386(4) Uani 1 1 d . . . 
Br Br -0.10581(4) 0.97766(4) -0.75157(4) 0.03378(9) Uani 1 1 d . . . 
Cl Cl -0.56011(8) 0.67080(7) -0.19917(7) 0.01917(14) Uani 1 1 d . . . 
N1 N -0.3013(3) 0.4096(3) -0.3215(2) 0.0153(5) Uani 1 1 d . . . 
N2 N -0.3321(3) 0.2147(3) -0.4118(3) 0.0193(5) Uani 1 1 d . . . 
C1 C -0.1478(3) 0.6476(3) -0.4826(3) 0.0179(6) Uani 1 1 d . . . 
H1 H -0.1093 0.6185 -0.4091 0.021 Uiso 1 1 calc R . . 
C2 C -0.1048(3) 0.7697(3) -0.5510(3) 0.0203(6) Uani 1 1 d . . . 
H2 H -0.0365 0.8237 -0.5254 0.024 Uiso 1 1 calc R . . 
C3 C -0.1632(3) 0.8109(3) -0.6568(3) 0.0204(6) Uani 1 1 d . . . 
C4 C -0.2616(3) 0.7341(3) -0.6971(3) 0.0202(6) Uani 1 1 d . . . 
H4 H -0.3008 0.7647 -0.7699 0.024 Uiso 1 1 calc R . . 
C5 C -0.3023(3) 0.6110(3) -0.6292(3) 0.0176(6) Uani 1 1 d . . . 
H5 H -0.3684 0.5562 -0.6568 0.021 Uiso 1 1 calc R . . 
C6 C -0.2470(3) 0.5672(3) -0.5210(3) 0.0145(5) Uani 1 1 d . . . 
C7 C -0.2865(3) 0.4340(3) -0.4532(3) 0.0151(5) Uani 1 1 d . . . 
C8 C -0.3068(3) 0.3145(3) -0.5095(3) 0.0185(6) Uani 1 1 d . . . 
H8 H -0.3040 0.3031 -0.5984 0.022 Uiso 1 1 calc R . . 
C9 C -0.3611(4) 0.0771(3) -0.4147(4) 0.0266(7) Uani 1 1 d . . . 
H9A H -0.3661 0.0379 -0.4936 0.032 Uiso 1 1 calc R . . 
C10 C -0.3826(4) -0.0013(3) -0.3030(4) 0.0311(8) Uani 1 1 d . . . 
H10 H -0.4019 -0.0963 -0.3036 0.037 Uiso 1 1 calc R . . 
C11 C -0.3762(4) 0.0579(3) -0.1860(4) 0.0299(8) Uani 1 1 d . . . 
H11 H -0.3909 0.0014 -0.1088 0.036 Uiso 1 1 calc R . . 
C12 C -0.3496(3) 0.1939(3) -0.1809(3) 0.0230(6) Uani 1 1 d . . . 
H12 H -0.3459 0.2329 -0.1015 0.028 Uiso 1 1 calc R . . 
C13 C -0.3277(3) 0.2754(3) -0.2974(3) 0.0177(6) Uani 1 1 d . . . 
C14 C -0.1222(4) 0.4545(4) -0.1053(3) 0.0236(6) Uani 1 1 d . . . 
H14B H -0.171(4) 0.395(4) -0.032(4) 0.020(9) Uiso 1 1 d . . . 
H14A H -0.027(4) 0.414(4) -0.164(4) 0.023(9) Uiso 1 1 d . . . 
C15 C -0.1458(3) 0.6040(3) -0.0859(3) 0.0202(6) Uani 1 1 d . . . 
C16 C -0.3021(4) 0.6598(4) -0.0106(3) 0.0211(6) Uani 1 1 d . . . 
H16B H -0.359(5) 0.610(4) 0.068(4) 0.036(11) Uiso 1 1 d . . . 
H16A H -0.334(4) 0.765(4) -0.003(4) 0.024(9) Uiso 1 1 d . . . 
C17 C -0.0301(4) 0.6972(4) -0.1630(3) 0.0284(7) Uani 1 1 d . . . 
H17C H 0.0352 0.7222 -0.1089 0.043 Uiso 1 1 calc R . . 
H17B H -0.0889 0.7836 -0.1896 0.043 Uiso 1 1 calc R . . 
H17A H 0.0392 0.6466 -0.2411 0.043 Uiso 1 1 calc R . . 
 
loop_ 
 _atom_site_aniso_label 
 _atom_site_aniso_U_11 
 _atom_site_aniso_U_22 
 _atom_site_aniso_U_33 
 _atom_site_aniso_U_23 
 _atom_site_aniso_U_13 
 _atom_site_aniso_U_12 
Pt 0.01384(6) 0.01379(7) 0.01330(6) 0.00087(4) -0.00317(4) -0.00130(4) 
Br 0.04091(19) 0.01993(17) 0.03358(19) 0.00873(14) 0.00180(14) -0.00851(13) 
Cl 0.0174(3) 0.0173(3) 0.0229(3) 0.0011(3) -0.0072(3) -0.0001(2) 
N1 0.0138(10) 0.0139(12) 0.0157(11) -0.0001(9) -0.0007(8) -0.0007(9) 
N2 0.0164(11) 0.0129(12) 0.0248(13) -0.0011(10) 0.0008(9) -0.0026(9) 
C1 0.0148(12) 0.0188(15) 0.0189(14) -0.0014(11) -0.0028(10) -0.0020(10) 
C2 0.0173(13) 0.0170(15) 0.0256(15) -0.0032(12) -0.0024(11) -0.0047(11) 
C3 0.0206(13) 0.0133(14) 0.0216(15) 0.0021(11) 0.0025(11) -0.0014(11) 
C4 0.0200(13) 0.0200(15) 0.0173(14) 0.0011(11) -0.0024(11) 0.0023(11) 
C5 0.0146(12) 0.0195(15) 0.0174(14) -0.0045(11) -0.0022(10) -0.0011(10) 
C6 0.0121(11) 0.0134(14) 0.0149(13) -0.0003(10) 0.0012(9) -0.0010(10) 
C7 0.0120(11) 0.0148(14) 0.0171(14) -0.0004(11) -0.0016(10) -0.0018(10) 
C8 0.0170(13) 0.0172(15) 0.0188(14) -0.0030(11) -0.0006(10) -0.0024(10) 
C9 0.0230(15) 0.0147(15) 0.0364(19) -0.0072(13) 0.0031(13) -0.0045(12) 
C10 0.0272(16) 0.0120(15) 0.043(2) 0.0010(14) 0.0073(14) -0.0019(12) 
C11 0.0251(15) 0.0188(17) 0.0356(19) 0.0093(14) 0.0039(13) 0.0016(12) 
C12 0.0200(14) 0.0207(16) 0.0230(15) 0.0043(12) 0.0000(11) 0.0007(11) 
C13 0.0148(12) 0.0140(14) 0.0208(14) -0.0003(11) -0.0005(10) 0.0007(10) 
C14 0.0211(14) 0.0234(17) 0.0274(17) 0.0021(13) -0.0109(12) 0.0008(12) 
C15 0.0197(13) 0.0256(16) 0.0198(14) 0.0018(12) -0.0121(11) -0.0048(12) 
C16 0.0257(14) 0.0220(16) 0.0170(14) -0.0007(12) -0.0073(11) -0.0046(12) 
C17 0.0265(15) 0.0345(19) 0.0295(17) 0.0061(14) -0.0131(13) -0.0125(14) 
 
_geom_special_details 
; 
 All esds (except the esd in the dihedral angle between two l.s. planes) 
 are estimated using the full covariance matrix.  The cell esds are taken 
 into account individually in the estimation of esds in distances, angles 
 and torsion angles; correlations between esds in cell parameters are only 
 used when they are defined by crystal symmetry.  An approximate (isotropic) 
 treatment of cell esds is used for estimating esds involving l.s. planes. 
; 
 
loop_ 
 _geom_bond_atom_site_label_1 
 _geom_bond_atom_site_label_2 
 _geom_bond_distance 
 _geom_bond_site_symmetry_2 
 _geom_bond_publ_flag 
Pt N1 2.092(2) . ? 
Pt C15 2.097(3) . ? 
Pt C16 2.097(3) . ? 
Pt C14 2.099(3) . ? 
Pt Cl 2.3677(6) . ? 
Br C3 1.903(3) . ? 
N1 C13 1.338(4) . ? 
N1 C7 1.382(4) . ? 
N2 C8 1.371(4) . ? 
N2 C9 1.380(4) . ? 
N2 C13 1.385(4) . ? 
C1 C2 1.390(4) . ? 
C1 C6 1.398(4) . ? 
C1 H1 0.9500 . ? 
C2 C3 1.381(4) . ? 
C2 H2 0.9500 . ? 
C3 C4 1.381(4) . ? 
C4 C5 1.392(4) . ? 
C4 H4 0.9500 . ? 
C5 C6 1.394(4) . ? 
C5 H5 0.9500 . ? 
C6 C7 1.472(4) . ? 
C7 C8 1.372(4) . ? 
C8 H8 0.9500 . ? 
C9 C10 1.357(5) . ? 
C9 H9A 0.9500 . ? 
C10 C11 1.409(5) . ? 
C10 H10 0.9500 . ? 
C11 C12 1.361(5) . ? 
C11 H11 0.9500 . ? 
C12 C13 1.414(4) . ? 
C12 H12 0.9500 . ? 
C14 C15 1.427(5) . ? 
C14 H14B 0.98(4) . ? 
C14 H14A 0.94(4) . ? 
C15 C16 1.424(4) . ? 
C15 C17 1.499(4) . ? 
C16 H16B 0.99(4) . ? 
C16 H16A 1.00(4) . ? 
C17 H17C 0.9800 . ? 
C17 H17B 0.9800 . ? 
C17 H17A 0.9800 . ? 
 
loop_ 
 _geom_angle_atom_site_label_1 
 _geom_angle_atom_site_label_2 
 _geom_angle_atom_site_label_3 
 _geom_angle 
 _geom_angle_site_symmetry_1 
 _geom_angle_site_symmetry_3 
 _geom_angle_publ_flag 
N1 Pt C15 132.85(10) . . ? 
N1 Pt C16 168.92(11) . . ? 
C15 Pt C16 39.70(12) . . ? 
N1 Pt C14 99.95(11) . . ? 
C15 Pt C14 39.78(12) . . ? 
C16 Pt C14 69.54(12) . . ? 
N1 Pt Cl 90.34(6) . . ? 
C15 Pt Cl 133.84(9) . . ? 
C16 Pt Cl 99.65(9) . . ? 
C14 Pt Cl 167.31(10) . . ? 
C13 N1 C7 106.8(2) . . ? 
C13 N1 Pt 122.6(2) . . ? 
C7 N1 Pt 130.12(19) . . ? 
C8 N2 C9 130.3(3) . . ? 
C8 N2 C13 108.0(2) . . ? 
C9 N2 C13 121.7(3) . . ? 
C2 C1 C6 120.7(3) . . ? 
C2 C1 H1 119.7 . . ? 
C6 C1 H1 119.7 . . ? 
C3 C2 C1 118.8(3) . . ? 
C3 C2 H2 120.6 . . ? 
C1 C2 H2 120.6 . . ? 
C4 C3 C2 122.1(3) . . ? 
C4 C3 Br 118.6(2) . . ? 
C2 C3 Br 119.4(2) . . ? 
C3 C4 C5 118.8(3) . . ? 
C3 C4 H4 120.6 . . ? 
C5 C4 H4 120.6 . . ? 
C4 C5 C6 120.6(3) . . ? 
C4 C5 H5 119.7 . . ? 
C6 C5 H5 119.7 . . ? 
C5 C6 C1 119.1(3) . . ? 
C5 C6 C7 119.8(3) . . ? 
C1 C6 C7 121.0(3) . . ? 
C8 C7 N1 109.6(2) . . ? 
C8 C7 C6 126.4(3) . . ? 
N1 C7 C6 123.9(2) . . ? 
N2 C8 C7 106.3(3) . . ? 
N2 C8 H8 126.9 . . ? 
C7 C8 H8 126.9 . . ? 
C10 C9 N2 118.9(3) . . ? 
C10 C9 H9A 120.5 . . ? 
N2 C9 H9A 120.5 . . ? 
C9 C10 C11 120.3(3) . . ? 
C9 C10 H10 119.9 . . ? 
C11 C10 H10 119.9 . . ? 
C12 C11 C10 121.6(3) . . ? 
C12 C11 H11 119.2 . . ? 
C10 C11 H11 119.2 . . ? 
C11 C12 C13 118.0(3) . . ? 
C11 C12 H12 121.0 . . ? 
C13 C12 H12 121.0 . . ? 
N1 C13 N2 109.3(3) . . ? 
N1 C13 C12 131.2(3) . . ? 
N2 C13 C12 119.5(3) . . ? 
C15 C14 Pt 70.04(16) . . ? 
C15 C14 H14B 118(2) . . ? 
Pt C14 H14B 103.6(19) . . ? 
C15 C14 H14A 118(2) . . ? 
Pt C14 H14A 121(2) . . ? 
H14B C14 H14A 117(3) . . ? 
C16 C15 C14 114.1(3) . . ? 
C16 C15 C17 122.2(3) . . ? 
C14 C15 C17 122.3(3) . . ? 
C16 C15 Pt 70.16(16) . . ? 
C14 C15 Pt 70.19(16) . . ? 
C17 C15 Pt 117.4(2) . . ? 
C15 C16 Pt 70.14(17) . . ? 
C15 C16 H16B 121(2) . . ? 
Pt C16 H16B 107(2) . . ? 
C15 C16 H16A 119(2) . . ? 
Pt C16 H16A 121(2) . . ? 
H16B C16 H16A 112(3) . . ? 
C15 C17 H17C 109.5 . . ? 
C15 C17 H17B 109.5 . . ? 
H17C C17 H17B 109.5 . . ? 
C15 C17 H17A 109.5 . . ? 
H17C C17 H17A 109.5 . . ? 
H17B C17 H17A 109.5 . . ? 
 
_diffrn_measured_fraction_theta_max    0.966 
_diffrn_reflns_theta_full              25.00 
_diffrn_measured_fraction_theta_full   0.996 
_refine_diff_density_max    1.239 
_refine_diff_density_min   -1.324 
_refine_diff_density_rms    0.118 


#===END

 
data_4 
 
_audit_creation_method            SHELXL-97 
_chemical_name_systematic 
; 
 ? 
; 
_chemical_name_common             ? 
_chemical_melting_point           ? 
_chemical_formula_moiety          ? 
_chemical_formula_sum 
 'C32 H24 Br Cl4 N2 P Pt' 
_chemical_formula_weight          884.30 
 
loop_ 
 _atom_type_symbol 
 _atom_type_description 
 _atom_type_scat_dispersion_real 
 _atom_type_scat_dispersion_imag 
 _atom_type_scat_source 
 'C'  'C'   0.0033   0.0016 
 'International Tables Vol C Tables 4.2.6.8 and 6.1.1.4' 
 'H'  'H'   0.0000   0.0000 
 'International Tables Vol C Tables 4.2.6.8 and 6.1.1.4' 
 'N'  'N'   0.0061   0.0033 
 'International Tables Vol C Tables 4.2.6.8 and 6.1.1.4' 
 'P'  'P'   0.1023   0.0942 
 'International Tables Vol C Tables 4.2.6.8 and 6.1.1.4' 
 'Cl'  'Cl'   0.1484   0.1585 
 'International Tables Vol C Tables 4.2.6.8 and 6.1.1.4' 
 'Br'  'Br'  -0.2901   2.4595 
 'International Tables Vol C Tables 4.2.6.8 and 6.1.1.4' 
 'Pt'  'Pt'  -1.7033   8.3905 
 'International Tables Vol C Tables 4.2.6.8 and 6.1.1.4' 
 
_symmetry_cell_setting            monoclinic 
_symmetry_space_group_name_H-M    P2(1)/c
 
loop_ 
 _symmetry_equiv_pos_as_xyz 
 'x, y, z' 
 '-x, y+1/2, -z+1/2' 
 '-x, -y, -z' 
 'x, -y-1/2, z-1/2' 
 
_cell_length_a                    20.3525(5) 
_cell_length_b                    8.16600(10) 
_cell_length_c                    20.4811(5) 
_cell_angle_alpha                 90.00 
_cell_angle_beta                  118.070(3) 
_cell_angle_gamma                 90.00 
_cell_volume                      3003.53(11) 
_cell_formula_units_Z             4 
_cell_measurement_temperature     100(2) 
_cell_measurement_reflns_used   14693
_cell_measurement_theta_min     3.8636
_cell_measurement_theta_max     28.9194
 
_exptl_crystal_description        plate 
_exptl_crystal_colour             colourless 
_exptl_crystal_size_max           0.46 
_exptl_crystal_size_mid           0.08 
_exptl_crystal_size_min           0.03 
_exptl_crystal_density_meas       ? 
_exptl_crystal_density_diffrn     1.956 
_exptl_crystal_density_method     'not measured' 
_exptl_crystal_F_000              1704 
_exptl_absorpt_coefficient_mu     6.438 
_exptl_absorpt_correction_type    'multi-scan' 
_exptl_absorpt_correction_T_min   0.1557 
_exptl_absorpt_correction_T_max   0.8303 
_exptl_absorpt_process_details
;
CrysAlis RED, Oxford Diffraction Ltd.,
Version 1.171.33.31 (release 08-01-2009 CrysAlis171 .NET)
(compiled Jan  8 2009,16:24:04)
Empirical absorption correction using spherical harmonics,
 implemented in SCALE3 ABSPACK scaling algorithm.
;
 
_diffrn_ambient_temperature       100(2) 
_diffrn_radiation_wavelength      0.71073 
_diffrn_radiation_type            MoK\a 
_diffrn_radiation_source 'Enhance (Mo) X-ray Source'
_diffrn_radiation_monochromator 'graphite'
_diffrn_measurement_device_type 'Goniometer KM4/Xcalibur, detector: Sapphire3'
_diffrn_detector_area_resol_mean 16.0655
_diffrn_measurement_method '\w scans'
_diffrn_standards_number          ? 
_diffrn_standards_interval_count  ? 
_diffrn_standards_interval_time   ? 
_diffrn_standards_decay_%         ? 
_diffrn_reflns_number             27146 
_diffrn_reflns_av_R_equivalents   0.0387 
_diffrn_reflns_av_sigmaI/netI     0.0473 
_diffrn_reflns_limit_h_min        -25 
_diffrn_reflns_limit_h_max        27 
_diffrn_reflns_limit_k_min        -10 
_diffrn_reflns_limit_k_max        10 
_diffrn_reflns_limit_l_min        -26 
_diffrn_reflns_limit_l_max        27 
_diffrn_reflns_theta_min          3.87 
_diffrn_reflns_theta_max          28.97 
_diffrn_orient_matrix_UB_11       0.0278417815
_diffrn_orient_matrix_UB_12       0.0485750987
_diffrn_orient_matrix_UB_13      -0.0021352315
_diffrn_orient_matrix_UB_21       0.0205479082
_diffrn_orient_matrix_UB_22       0.0011899567
_diffrn_orient_matrix_UB_23       0.0392008114
_diffrn_orient_matrix_UB_31       0.0190585653
_diffrn_orient_matrix_UB_32      -0.0720785927
_diffrn_orient_matrix_UB_33      -0.0008247146
_diffrn_measurement_details
;
#__ type_ start__ end____ width___ exp.time_
  1 omega  -28.00   53.00   1.0000   10.0000
omega____ theta____ kappa____ phi______ frames
    -      -19.8053   77.0000  270.0000 81

#__ type_ start__ end____ width___ exp.time_
  2 omega  -40.00   88.00   1.0000   10.0000
omega____ theta____ kappa____ phi______ frames
    -       22.2271    0.0000  300.0000 128

#__ type_ start__ end____ width___ exp.time_
  3 omega   59.00   94.00   1.0000   10.0000
omega____ theta____ kappa____ phi______ frames
    -       22.2271  179.0000  300.0000 35

#__ type_ start__ end____ width___ exp.time_
  4 omega  -11.00   95.00   1.0000   10.0000
omega____ theta____ kappa____ phi______ frames
    -       22.2271   77.0000    0.0000 106

#__ type_ start__ end____ width___ exp.time_
  5 omega   34.00   83.00   1.0000   10.0000
omega____ theta____ kappa____ phi______ frames
    -       22.2271  179.0000  240.0000 49

#__ type_ start__ end____ width___ exp.time_
  6 omega  -50.00   49.00   1.0000   10.0000
omega____ theta____ kappa____ phi______ frames
    -       22.2271  -45.0000  283.0000 99

;
_reflns_number_total              7092 
_reflns_number_gt                 5636 
_reflns_threshold_expression      >2sigma(I) 
 
_computing_data_collection
;
CrysAlis CCD, Oxford Diffraction Ltd.,
Version 1.171.33.31 (release 08-01-2009 CrysAlis171 .NET)
(compiled Jan  8 2009,16:24:04)
;
_computing_cell_refinement
;
CrysAlis RED, Oxford Diffraction Ltd.,
Version 1.171.33.31 (release 08-01-2009 CrysAlis171 .NET)
(compiled Jan  8 2009,16:24:04)
;
_computing_data_reduction
;
CrysAlis RED, Oxford Diffraction Ltd.,
Version 1.171.33.31 (release 08-01-2009 CrysAlis171 .NET)
(compiled Jan  8 2009,16:24:04)
;
_computing_structure_solution     'SHELXS-97 (Sheldrick, 1990)' 
_computing_structure_refinement   'SHELXL-97 (Sheldrick, 1997)' 
_computing_molecular_graphics     ? 
_computing_publication_material   ? 
 
_refine_special_details 
; 
 Refinement of F^2^ against ALL reflections.  The weighted R-factor wR and 
 goodness of fit S are based on F^2^, conventional R-factors R are based 
 on F, with F set to zero for negative F^2^. The threshold expression of 
 F^2^ > 2sigma(F^2^) is used only for calculating R-factors(gt) etc. and is 
 not relevant to the choice of reflections for refinement.  R-factors based 
 on F^2^ are statistically about twice as large as those based on F, and R- 
 factors based on ALL data will be even larger. 
; 
 
_refine_ls_structure_factor_coef  Fsqd  
_refine_ls_matrix_type            full 
_refine_ls_weighting_scheme       calc  
_refine_ls_weighting_details 
 'calc w=1/[\s^2^(Fo^2^)+(0.0200P)^2^+0.0000P] where P=(Fo^2^+2Fc^2^)/3' 
_atom_sites_solution_primary      direct 
_atom_sites_solution_secondary    difmap 
_atom_sites_solution_hydrogens    geom 
_refine_ls_hydrogen_treatment     constr
_refine_ls_extinction_method      none 
_refine_ls_extinction_coef        ? 
_refine_ls_number_reflns          7092 
_refine_ls_number_parameters      370 
_refine_ls_number_restraints      0 
_refine_ls_R_factor_all           0.0359 
_refine_ls_R_factor_gt            0.0255 
_refine_ls_wR_factor_ref          0.0505 
_refine_ls_wR_factor_gt           0.0497 
_refine_ls_goodness_of_fit_ref    1.045 
_refine_ls_restrained_S_all       1.045 
_refine_ls_shift/su_max           0.001 
_refine_ls_shift/su_mean          0.000 
 
loop_ 
 _atom_site_label 
 _atom_site_type_symbol 
 _atom_site_fract_x 
 _atom_site_fract_y 
 _atom_site_fract_z 
 _atom_site_U_iso_or_equiv 
 _atom_site_adp_type 
 _atom_site_occupancy 
 _atom_site_symmetry_multiplicity 
 _atom_site_calc_flag 
 _atom_site_refinement_flags 
 _atom_site_disorder_assembly 
 _atom_site_disorder_group 
Pt Pt 0.305126(7) 0.913008(15) 0.246862(7) 0.01006(4) Uani 1 1 d . . . 
Br Br 0.11019(2) 0.80085(4) -0.075534(19) 0.01604(8) Uani 1 1 d . . . 
Cl1 Cl 0.34916(5) 0.98372(11) 0.37365(5) 0.01833(19) Uani 1 1 d . . . 
P P 0.19248(5) 1.01133(11) 0.21783(5) 0.01045(18) Uani 1 1 d . . . 
N1 N 0.40910(15) 0.8211(3) 0.26697(15) 0.0115(6) Uani 1 1 d . . . 
N2 N 0.52019(16) 0.7144(3) 0.29730(16) 0.0135(6) Uani 1 1 d . . . 
C1 C 0.27888(19) 0.8381(4) 0.14295(19) 0.0121(7) Uani 1 1 d . . . 
C2 C 0.21061(19) 0.8459(4) 0.07727(18) 0.0113(7) Uani 1 1 d . . . 
H2 H 0.1679 0.8889 0.0786 0.014 Uiso 1 1 calc R . . 
C3 C 0.20507(19) 0.7914(4) 0.01074(19) 0.0132(8) Uani 1 1 d . . . 
C4 C 0.2654(2) 0.7287(4) 0.00492(19) 0.0150(8) Uani 1 1 d . . . 
H4 H 0.2606 0.6953 -0.0415 0.018 Uiso 1 1 calc R . . 
C5 C 0.3329(2) 0.7162(4) 0.06885(19) 0.0166(8) Uani 1 1 d . . . 
H5 H 0.3750 0.6720 0.0667 0.020 Uiso 1 1 calc R . . 
C6 C 0.33905(19) 0.7684(4) 0.13614(19) 0.0124(7) Uani 1 1 d . . . 
C7 C 0.4085(2) 0.7553(4) 0.20453(19) 0.0137(7) Uani 1 1 d . . . 
C8 C 0.4763(2) 0.6898(4) 0.22217(19) 0.0165(8) Uani 1 1 d . . . 
H8 H 0.4906 0.6375 0.1894 0.020 Uiso 1 1 calc R . . 
C9 C 0.5931(2) 0.6734(4) 0.3415(2) 0.0179(8) Uani 1 1 d . . . 
H9 H 0.6202 0.6163 0.3215 0.022 Uiso 1 1 calc R . . 
C10 C 0.6262(2) 0.7148(4) 0.4139(2) 0.0216(9) Uani 1 1 d . . . 
H10 H 0.6768 0.6870 0.4452 0.026 Uiso 1 1 calc R . . 
C11 C 0.5847(2) 0.8004(4) 0.4432(2) 0.0192(8) Uani 1 1 d . . . 
H11 H 0.6083 0.8311 0.4939 0.023 Uiso 1 1 calc R . . 
C12 C 0.5120(2) 0.8384(4) 0.39942(19) 0.0164(8) Uani 1 1 d . . . 
H12 H 0.4844 0.8932 0.4195 0.020 Uiso 1 1 calc R . . 
C13 C 0.4778(2) 0.7960(4) 0.32415(19) 0.0126(7) Uani 1 1 d . . . 
C14 C 0.1535(2) 1.1505(4) 0.13865(19) 0.0127(7) Uani 1 1 d . . . 
C15 C 0.0792(2) 1.1510(4) 0.08487(19) 0.0145(8) Uani 1 1 d . . . 
H15 H 0.0459 1.0720 0.0868 0.017 Uiso 1 1 calc R . . 
C16 C 0.0533(2) 1.2658(4) 0.02855(19) 0.0184(8) Uani 1 1 d . . . 
H16 H 0.0025 1.2649 -0.0082 0.022 Uiso 1 1 calc R . . 
C17 C 0.1012(2) 1.3817(4) 0.0257(2) 0.0212(9) Uani 1 1 d . . . 
H17 H 0.0830 1.4617 -0.0124 0.025 Uiso 1 1 calc R . . 
C18 C 0.1751(2) 1.3824(4) 0.0776(2) 0.0183(8) Uani 1 1 d . . . 
H18 H 0.2076 1.4629 0.0754 0.022 Uiso 1 1 calc R . . 
C19 C 0.2021(2) 1.2651(4) 0.13341(19) 0.0156(8) Uani 1 1 d . . . 
H19 H 0.2536 1.2627 0.1681 0.019 Uiso 1 1 calc R . . 
C20 C 0.12089(19) 0.8572(4) 0.19940(19) 0.0124(7) Uani 1 1 d . . . 
C21 C 0.05521(19) 0.8983(4) 0.20115(19) 0.0156(8) Uani 1 1 d . . . 
H21 H 0.0468 1.0085 0.2101 0.019 Uiso 1 1 calc R . . 
C22 C 0.0023(2) 0.7807(4) 0.19009(19) 0.0178(8) Uani 1 1 d . . . 
H22 H -0.0415 0.8093 0.1929 0.021 Uiso 1 1 calc R . . 
C23 C 0.0134(2) 0.6204(4) 0.1748(2) 0.0184(8) Uani 1 1 d . . . 
H23 H -0.0231 0.5393 0.1666 0.022 Uiso 1 1 calc R . . 
C24 C 0.0773(2) 0.5792(4) 0.17171(19) 0.0168(8) Uani 1 1 d . . . 
H24 H 0.0844 0.4698 0.1606 0.020 Uiso 1 1 calc R . . 
C25 C 0.13166(19) 0.6960(4) 0.18467(18) 0.0122(7) Uani 1 1 d . . . 
H25 H 0.1762 0.6659 0.1835 0.015 Uiso 1 1 calc R . . 
C26 C 0.18936(18) 1.1335(4) 0.29129(19) 0.0123(7) Uani 1 1 d . . . 
C27 C 0.20029(19) 1.3033(4) 0.29596(19) 0.0151(8) Uani 1 1 d . . . 
H27 H 0.2062 1.3597 0.2585 0.018 Uiso 1 1 calc R . . 
C28 C 0.2025(2) 1.3889(4) 0.3555(2) 0.0179(8) Uani 1 1 d . . . 
H28 H 0.2088 1.5044 0.3582 0.021 Uiso 1 1 calc R . . 
C29 C 0.1954(2) 1.3068(5) 0.41109(19) 0.0197(8) Uani 1 1 d . . . 
H29 H 0.1968 1.3660 0.4517 0.024 Uiso 1 1 calc R . . 
C30 C 0.18620(19) 1.1384(4) 0.40737(19) 0.0176(8) Uani 1 1 d . . . 
H30 H 0.1822 1.0816 0.4458 0.021 Uiso 1 1 calc R . . 
C31 C 0.18291(19) 1.0531(4) 0.34765(19) 0.0145(8) Uani 1 1 d . . . 
H31 H 0.1761 0.9377 0.3452 0.017 Uiso 1 1 calc R . . 
Cl2 Cl 0.49090(7) 0.34781(16) 0.42751(7) 0.0468(3) Uani 1 1 d . . . 
Cl3 Cl 0.37023(7) 0.57128(14) 0.39736(7) 0.0427(3) Uani 1 1 d . . . 
Cl4 Cl 0.37963(6) 0.41007(13) 0.27770(6) 0.0368(3) Uani 1 1 d . . . 
C32 C 0.3967(2) 0.3927(5) 0.3693(2) 0.0365(11) Uani 1 1 d . . . 
H32 H 0.3661 0.3001 0.3723 0.044 Uiso 1 1 calc R . . 
 
loop_ 
 _atom_site_aniso_label 
 _atom_site_aniso_U_11 
 _atom_site_aniso_U_22 
 _atom_site_aniso_U_33 
 _atom_site_aniso_U_23 
 _atom_site_aniso_U_13 
 _atom_site_aniso_U_12 
Pt 0.00955(7) 0.01202(7) 0.00850(6) -0.00025(6) 0.00416(5) 0.00086(7) 
Br 0.01342(18) 0.01955(19) 0.01129(17) -0.00089(14) 0.00263(15) -0.00084(16) 
Cl1 0.0150(5) 0.0266(5) 0.0103(4) -0.0039(4) 0.0034(4) 0.0052(4) 
P 0.0109(5) 0.0113(5) 0.0100(4) 0.0005(4) 0.0056(4) 0.0008(4) 
N1 0.0108(15) 0.0141(15) 0.0098(15) -0.0016(12) 0.0050(13) 0.0028(13) 
N2 0.0109(16) 0.0146(16) 0.0133(16) 0.0005(12) 0.0044(13) 0.0029(13) 
C1 0.0143(19) 0.0105(17) 0.0133(18) 0.0004(14) 0.0078(16) -0.0002(15) 
C2 0.0111(18) 0.0105(17) 0.0137(18) 0.0000(14) 0.0070(15) 0.0000(15) 
C3 0.0135(19) 0.0120(18) 0.0120(18) 0.0010(14) 0.0042(16) -0.0024(16) 
C4 0.018(2) 0.0166(19) 0.0104(18) -0.0041(15) 0.0066(16) -0.0032(16) 
C5 0.015(2) 0.020(2) 0.0167(19) -0.0037(16) 0.0098(17) 0.0015(17) 
C6 0.0122(18) 0.0105(18) 0.0125(18) -0.0011(14) 0.0042(15) -0.0021(15) 
C7 0.0165(19) 0.0115(17) 0.0146(18) -0.0026(15) 0.0087(16) -0.0015(16) 
C8 0.016(2) 0.020(2) 0.0146(19) -0.0017(15) 0.0077(16) 0.0005(16) 
C9 0.0124(19) 0.019(2) 0.021(2) -0.0001(16) 0.0069(17) 0.0037(17) 
C10 0.0102(19) 0.030(2) 0.017(2) 0.0008(17) -0.0006(16) 0.0020(18) 
C11 0.017(2) 0.025(2) 0.0125(19) -0.0016(16) 0.0040(17) -0.0003(17) 
C12 0.017(2) 0.0190(19) 0.0146(19) -0.0017(15) 0.0083(17) 0.0004(17) 
C13 0.0133(19) 0.0108(18) 0.0122(18) 0.0017(14) 0.0046(16) 0.0004(15) 
C14 0.0167(19) 0.0129(17) 0.0126(18) 0.0003(14) 0.0103(16) 0.0032(16) 
C15 0.016(2) 0.0145(18) 0.0141(19) 0.0009(15) 0.0083(16) 0.0013(16) 
C16 0.019(2) 0.021(2) 0.0113(19) 0.0024(15) 0.0045(17) 0.0073(17) 
C17 0.031(2) 0.021(2) 0.016(2) 0.0069(16) 0.0149(18) 0.0103(18) 
C18 0.025(2) 0.020(2) 0.018(2) 0.0035(16) 0.0170(18) -0.0003(17) 
C19 0.016(2) 0.0187(19) 0.0130(18) -0.0011(15) 0.0078(16) 0.0008(16) 
C20 0.0121(18) 0.0168(18) 0.0088(17) 0.0014(14) 0.0054(15) -0.0014(15) 
C21 0.0158(19) 0.0164(19) 0.0159(18) -0.0004(15) 0.0084(16) 0.0023(17) 
C22 0.0102(19) 0.025(2) 0.017(2) -0.0023(16) 0.0057(16) -0.0007(17) 
C23 0.018(2) 0.019(2) 0.0156(19) -0.0026(15) 0.0067(17) -0.0082(17) 
C24 0.021(2) 0.0128(18) 0.0150(18) -0.0023(15) 0.0075(16) -0.0010(17) 
C25 0.0113(18) 0.0146(18) 0.0109(18) -0.0001(14) 0.0053(15) 0.0010(15) 
C26 0.0084(17) 0.0165(18) 0.0108(18) 0.0005(14) 0.0035(15) 0.0048(15) 
C27 0.0131(19) 0.0162(19) 0.0125(18) 0.0009(15) 0.0030(16) 0.0021(16) 
C28 0.018(2) 0.0129(19) 0.021(2) -0.0043(16) 0.0075(17) 0.0017(16) 
C29 0.016(2) 0.029(2) 0.0090(18) -0.0051(16) 0.0017(16) 0.0067(18) 
C30 0.015(2) 0.027(2) 0.0115(18) 0.0027(15) 0.0070(16) 0.0064(17) 
C31 0.0144(19) 0.0147(19) 0.0144(18) 0.0029(14) 0.0067(16) 0.0031(15) 
Cl2 0.0368(7) 0.0630(8) 0.0360(7) -0.0076(6) 0.0132(6) 0.0065(6) 
Cl3 0.0389(7) 0.0409(7) 0.0533(8) -0.0081(6) 0.0258(6) -0.0033(6) 
Cl4 0.0379(6) 0.0400(6) 0.0303(6) -0.0009(5) 0.0141(5) -0.0048(6) 
C32 0.027(2) 0.038(3) 0.040(3) -0.008(2) 0.012(2) -0.001(2) 
 
_geom_special_details 
; 
 All esds (except the esd in the dihedral angle between two l.s. planes) 
 are estimated using the full covariance matrix.  The cell esds are taken 
 into account individually in the estimation of esds in distances, angles 
 and torsion angles; correlations between esds in cell parameters are only 
 used when they are defined by crystal symmetry.  An approximate (isotropic) 
 treatment of cell esds is used for estimating esds involving l.s. planes. 
; 
 
loop_ 
 _geom_bond_atom_site_label_1 
 _geom_bond_atom_site_label_2 
 _geom_bond_distance 
 _geom_bond_site_symmetry_2 
 _geom_bond_publ_flag 
Pt C1 2.030(3) . ? 
Pt N1 2.096(3) . ? 
Pt P 2.2297(9) . ? 
Pt Cl1 2.3854(8) . ? 
Br C3 1.910(3) . ? 
P C20 1.825(3) . ? 
P C14 1.828(3) . ? 
P C26 1.831(3) . ? 
N1 C13 1.352(4) . ? 
N1 C7 1.382(4) . ? 
N2 C9 1.367(4) . ? 
N2 C8 1.383(4) . ? 
N2 C13 1.391(4) . ? 
C1 C2 1.409(5) . ? 
C1 C6 1.416(4) . ? 
C2 C3 1.387(4) . ? 
C2 H2 0.9500 . ? 
C3 C4 1.386(5) . ? 
C4 C5 1.385(5) . ? 
C4 H4 0.9500 . ? 
C5 C6 1.390(4) . ? 
C5 H5 0.9500 . ? 
C6 C7 1.452(5) . ? 
C7 C8 1.361(5) . ? 
C8 H8 0.9500 . ? 
C9 C10 1.353(5) . ? 
C9 H9 0.9500 . ? 
C10 C11 1.428(5) . ? 
C10 H10 0.9500 . ? 
C11 C12 1.357(5) . ? 
C11 H11 0.9500 . ? 
C12 C13 1.404(5) . ? 
C12 H12 0.9500 . ? 
C14 C15 1.391(5) . ? 
C14 C19 1.401(5) . ? 
C15 C16 1.384(5) . ? 
C15 H15 0.9500 . ? 
C16 C17 1.380(5) . ? 
C16 H16 0.9500 . ? 
C17 C18 1.372(5) . ? 
C17 H17 0.9500 . ? 
C18 C19 1.391(5) . ? 
C18 H18 0.9500 . ? 
C19 H19 0.9500 . ? 
C20 C25 1.391(4) . ? 
C20 C21 1.395(4) . ? 
C21 C22 1.379(5) . ? 
C21 H21 0.9500 . ? 
C22 C23 1.389(5) . ? 
C22 H22 0.9500 . ? 
C23 C24 1.373(5) . ? 
C23 H23 0.9500 . ? 
C24 C25 1.388(5) . ? 
C24 H24 0.9500 . ? 
C25 H25 0.9500 . ? 
C26 C31 1.387(5) . ? 
C26 C27 1.400(5) . ? 
C27 C28 1.389(5) . ? 
C27 H27 0.9500 . ? 
C28 C29 1.385(5) . ? 
C28 H28 0.9500 . ? 
C29 C30 1.385(5) . ? 
C29 H29 0.9500 . ? 
C30 C31 1.382(5) . ? 
C30 H30 0.9500 . ? 
C31 H31 0.9500 . ? 
Cl2 C32 1.755(4) . ? 
Cl3 C32 1.744(4) . ? 
Cl4 C32 1.745(5) . ? 
C32 H32 1.0000 . ? 
 
loop_ 
 _geom_angle_atom_site_label_1 
 _geom_angle_atom_site_label_2 
 _geom_angle_atom_site_label_3 
 _geom_angle 
 _geom_angle_site_symmetry_1 
 _geom_angle_site_symmetry_3 
 _geom_angle_publ_flag 
C1 Pt N1 80.86(12) . . ? 
C1 Pt P 95.66(10) . . ? 
N1 Pt P 176.35(8) . . ? 
C1 Pt Cl1 173.33(10) . . ? 
N1 Pt Cl1 92.60(8) . . ? 
P Pt Cl1 90.89(3) . . ? 
C20 P C14 105.93(16) . . ? 
C20 P C26 102.27(15) . . ? 
C14 P C26 102.82(15) . . ? 
C20 P Pt 115.31(11) . . ? 
C14 P Pt 115.02(11) . . ? 
C26 P Pt 113.95(11) . . ? 
C13 N1 C7 107.3(3) . . ? 
C13 N1 Pt 139.6(2) . . ? 
C7 N1 Pt 112.9(2) . . ? 
C9 N2 C8 129.2(3) . . ? 
C9 N2 C13 122.5(3) . . ? 
C8 N2 C13 108.3(3) . . ? 
C2 C1 C6 115.7(3) . . ? 
C2 C1 Pt 130.0(2) . . ? 
C6 C1 Pt 114.3(2) . . ? 
C3 C2 C1 120.8(3) . . ? 
C3 C2 H2 119.6 . . ? 
C1 C2 H2 119.6 . . ? 
C4 C3 C2 122.5(3) . . ? 
C4 C3 Br 119.1(3) . . ? 
C2 C3 Br 118.4(3) . . ? 
C3 C4 C5 118.0(3) . . ? 
C3 C4 H4 121.0 . . ? 
C5 C4 H4 121.0 . . ? 
C4 C5 C6 120.1(3) . . ? 
C4 C5 H5 119.9 . . ? 
C6 C5 H5 119.9 . . ? 
C5 C6 C1 122.8(3) . . ? 
C5 C6 C7 121.8(3) . . ? 
C1 C6 C7 115.4(3) . . ? 
C8 C7 N1 109.9(3) . . ? 
C8 C7 C6 133.6(3) . . ? 
N1 C7 C6 116.4(3) . . ? 
C7 C8 N2 106.4(3) . . ? 
C7 C8 H8 126.8 . . ? 
N2 C8 H8 126.8 . . ? 
C10 C9 N2 119.3(3) . . ? 
C10 C9 H9 120.4 . . ? 
N2 C9 H9 120.4 . . ? 
C9 C10 C11 119.8(3) . . ? 
C9 C10 H10 120.1 . . ? 
C11 C10 H10 120.1 . . ? 
C12 C11 C10 120.7(3) . . ? 
C12 C11 H11 119.6 . . ? 
C10 C11 H11 119.6 . . ? 
C11 C12 C13 119.4(3) . . ? 
C11 C12 H12 120.3 . . ? 
C13 C12 H12 120.3 . . ? 
N1 C13 N2 108.1(3) . . ? 
N1 C13 C12 133.6(3) . . ? 
N2 C13 C12 118.3(3) . . ? 
C15 C14 C19 118.8(3) . . ? 
C15 C14 P 124.1(3) . . ? 
C19 C14 P 117.1(3) . . ? 
C16 C15 C14 120.5(3) . . ? 
C16 C15 H15 119.8 . . ? 
C14 C15 H15 119.8 . . ? 
C17 C16 C15 120.0(4) . . ? 
C17 C16 H16 120.0 . . ? 
C15 C16 H16 120.0 . . ? 
C18 C17 C16 120.6(3) . . ? 
C18 C17 H17 119.7 . . ? 
C16 C17 H17 119.7 . . ? 
C17 C18 C19 119.9(3) . . ? 
C17 C18 H18 120.1 . . ? 
C19 C18 H18 120.1 . . ? 
C18 C19 C14 120.2(3) . . ? 
C18 C19 H19 119.9 . . ? 
C14 C19 H19 119.9 . . ? 
C25 C20 C21 118.9(3) . . ? 
C25 C20 P 120.4(3) . . ? 
C21 C20 P 120.7(3) . . ? 
C22 C21 C20 120.8(3) . . ? 
C22 C21 H21 119.6 . . ? 
C20 C21 H21 119.6 . . ? 
C21 C22 C23 119.7(3) . . ? 
C21 C22 H22 120.1 . . ? 
C23 C22 H22 120.1 . . ? 
C24 C23 C22 119.9(3) . . ? 
C24 C23 H23 120.0 . . ? 
C22 C23 H23 120.0 . . ? 
C23 C24 C25 120.6(3) . . ? 
C23 C24 H24 119.7 . . ? 
C25 C24 H24 119.7 . . ? 
C24 C25 C20 119.9(3) . . ? 
C24 C25 H25 120.0 . . ? 
C20 C25 H25 120.0 . . ? 
C31 C26 C27 119.1(3) . . ? 
C31 C26 P 118.6(3) . . ? 
C27 C26 P 122.0(3) . . ? 
C28 C27 C26 119.8(3) . . ? 
C28 C27 H27 120.1 . . ? 
C26 C27 H27 120.1 . . ? 
C29 C28 C27 120.4(3) . . ? 
C29 C28 H28 119.8 . . ? 
C27 C28 H28 119.8 . . ? 
C30 C29 C28 119.9(3) . . ? 
C30 C29 H29 120.0 . . ? 
C28 C29 H29 120.0 . . ? 
C31 C30 C29 119.9(3) . . ? 
C31 C30 H30 120.0 . . ? 
C29 C30 H30 120.0 . . ? 
C30 C31 C26 120.9(3) . . ? 
C30 C31 H31 119.5 . . ? 
C26 C31 H31 119.5 . . ? 
Cl3 C32 Cl4 110.5(2) . . ? 
Cl3 C32 Cl2 111.0(2) . . ? 
Cl4 C32 Cl2 110.4(2) . . ? 
Cl3 C32 H32 108.3 . . ? 
Cl4 C32 H32 108.3 . . ? 
Cl2 C32 H32 108.3 . . ? 
 
_diffrn_measured_fraction_theta_max    0.891 
_diffrn_reflns_theta_full              25.00 
_diffrn_measured_fraction_theta_full   0.997 
_refine_diff_density_max    1.204 
_refine_diff_density_min   -1.331 
_refine_diff_density_rms    0.136 
